# Supplementary material for: A Critical Issue in Lung Cancer Cytology and Small Biopsies: DNA and RNA Extraction from Archival Stained Slides for Biomarker Detection through Real Time PCR and NGS—The Experience in Pathological Anatomy Unit
Source: MDPI journal article supplement (doi:10.3390/diagnostics13091637), 2023-05-05
Supplement: s1 [file s1]

**Table S1.** Years of collection of the samples analyzed in our series.

| SAMPLES ANALYZED |                     |                |                     |             |                     |
|------------------|---------------------|----------------|---------------------|-------------|---------------------|
| HISTOLOGICAL     |                     | SMALL BIOPSIES |                     | CYTOLOGICAL |                     |
| Cases            | Years of Collection | Cases          | Years of Collection | Cases       | Years of Collection |
| 1                | 2019                | 1              | 2021                | 1           | 2019                |
| 2                | 2019                | 2              | 2020                | 2           | 2019                |
| 3                | 2021                | 3              | 2019                | 3           | 2019                |
| 4                | 2021                | 4              | 2019                | 4           | 2021                |
| 5                | 2020                | 5              | 2021                | 5           | 2020                |
| 6                | 2022                | 6              | 2019                | 6           | 2019                |
| 7                | 2019                | 7              | 2020                | 7           | 2022                |
| 8                | 2021                | 8              | 2020                | 8           | 2021                |
| 9                | 2023                | 9              | 2022                | 9           | 2019                |
| 10               | 2019                | 10             | 2022                | 10          | 2019                |
| 11               | 2020                | 11             | 2023                | 11          | 2023                |
| 12               | 2020                | 12             | 2021                | 12          | 2021                |
| 13               | 2019                | 13             | 2021                | 13          | 2021                |
| 14               | 2019                | 14             | 2020                | 14          | 2021                |
| 15               | 2022                | 15             | 2023                | 15          | 2023                |
| 16               | 2023                |                |                     | 16          | 2020                |
| 17               | 2023                |                |                     | 17          | 2019                |
| 18               | 2021                |                |                     | 18          | 2019                |
| 19               | 2020                |                |                     | 19          | 2019                |
| 20               | 2020                |                |                     | 20          | 2023                |
| 21               | 2022                |                |                     | 21          | 2022                |
| 22               | 2022                |                |                     | 22          | 2021                |
| 23               | 2023                |                |                     | 23          | 2021                |
| 24               | 2021                |                |                     | 24          | 2020                |
| 25               | 2021                |                |                     | 25          | 2020                |
| 26               | 2021                |                |                     | 26          | 2023                |
| 27               | 2021                |                |                     | 27          | 2023                |
| 28               | 2023                |                |                     | 28          | 2019                |
| 29               | 2023                |                |                     | 29          | 2019                |
| 30               | 2020                |                |                     | 30          | 2021                |
| 31               | 2020                |                |                     | 31          | 2020                |
| 32               | 2020                |                |                     | 32          | 2023                |
| 33               | 2023                |                |                     | 33          | 2023                |
| 34               | 2022                |                |                     | 34          | 2022                |
| 35               | 2022                |                |                     | 35          | 2019                |
|                  |                     |                |                     | 36          | 2021                |
|                  |                     |                |                     | 37          | 2020                |
|                  |                     |                |                     | 38          | 2020                |
