# Supplementary material for: A Critical Issue in Lung Cancer Cytology and Small Biopsies: DNA and RNA Extraction from Archival Stained Slides for Biomarker Detection through Real Time PCR and NGS—The Experience in Pathological Anatomy Unit
Source: MDPI journal article supplement (doi:10.3390/diagnostics13091637), 2023-05-05
Supplement: s1 [file s1]

**Table S2.** Quality reports of NGS and Real Time PCR data.  
(EGFR L858R mutation ΔCq cut-off: ≤ 10.0, according to EasyPGX® ready EGFR kit manufacturer’s instructions).

| MSSs ELIGIBLE FOR NGS DNA-BASED |         |               |                            |           |             |                     |                         |      |                        |        |       |        |                                                   |
|---------------------------------|---------|---------------|----------------------------|-----------|-------------|---------------------|-------------------------|------|------------------------|--------|-------|--------|---------------------------------------------------|
| Types of samples                | Case ID | NGS ANALYSIS  |                            |           |             |                     |                         |      | REAL TIME PCR ANALYSIS |        |       |        | Concordance between NGS and Real Time PCR results |
|                                 |         | Mean Coverage | Uniformity of Coverage (%) | Raw Reads | Valid Reads | On-target Reads (%) | EGFR                    | BRAF | EGFR                   |        | BRAF  |        |                                                   |
|                                 |         |               |                            |           |             |                     |                         |      | ΔCq                    | Status | ΔCq   | Status |                                                   |
| HISTOLOGICAL (n. 18)            | 1       | 11939         | 81.69                      | 1173200   | 1084787     | 99.99               | WT                      | WT   | No Cq                  | WT     | No Cq | WT     | Yes                                               |
|                                 | 2       | 5941          | 74.72                      | 636554    | 551818      | 99.95               | WT                      | WT   | No Cq                  | WT     | No Cq | WT     | Yes                                               |
|                                 | 3       | 10781         | 76.43                      | 1111858   | 995813      | 99.98               | WT                      | WT   | No Cq                  | WT     | No Cq | WT     | Yes                                               |
|                                 | 4       | 7202          | 78.80                      | 776006    | 671223      | 99.96               | WT                      | WT   | No Cq                  | WT     | No Cq | WT     | Yes                                               |
|                                 | 5       | 6916          | 79.59                      | 738252    | 628387      | 99.98               | WT                      | WT   | No Cq                  | WT     | No Cq | WT     | Yes                                               |
|                                 | 7       | 5631          | 74.70                      | 629558    | 530582      | 99.97               | WT                      | WT   | No Cq                  | WT     | No Cq | WT     | Yes                                               |
|                                 | 9       | 5828          | 75.63                      | 653056    | 543914      | 99.99               | WT                      | WT   | No Cq                  | WT     | No Cq | WT     | Yes                                               |
|                                 | 10      | 6630          | 75.26                      | 786558    | 617566      | 99.97               | WT                      | WT   | No Cq                  | WT     | No Cq | WT     | Yes                                               |
|                                 | 11      | 6523          | 72.79                      | 712930    | 600259      | 99.98               | WT                      | WT   | No Cq                  | WT     | No Cq | WT     | Yes                                               |
|                                 | 12      | 5155          | 87.43                      | 598048    | 473006      | 99.97               | WT                      | WT   | No Cq                  | WT     | No Cq | WT     | Yes                                               |
|                                 | 14      | 4514          | 92.60                      | 536818    | 413831      | 99.90               | WT                      | WT   | No Cq                  | WT     | No Cq | WT     | Yes                                               |
|                                 | 18      | 5441          | 90.32                      | 596268    | 502279      | 99.97               | c.2573T>G (L858R) ex 21 | WT   | 2.0                    | MUT    | No Cq | WT     | Yes                                               |
|                                 | 19      | 4863          | 91.19                      | 545340    | 452561      | 99.96               | WT                      | WT   | No Cq                  | WT     | No Cq | WT     | Yes                                               |
|                                 | 28      | 7408          | 91.27                      | 819144    | 680007      | 99.93               | WT                      | WT   | No Cq                  | WT     | No Cq | WT     | Yes                                               |
|                                 | 30      | 7043          | 96.24                      | 777478    | 649193      | 99.98               | WT                      | WT   | No Cq                  | WT     | No Cq | WT     | Yes                                               |
|                                 | 32      | 6806          | 91.96                      | 799466    | 627420      | 99.95               | WT                      | WT   | No Cq                  | WT     | No Cq | WT     | Yes                                               |
|                                 | 33      | 7063          | 87.36                      | 887742    | 647748      | 99.95               | WT                      | WT   | No Cq                  | WT     | No Cq | WT     | Yes                                               |
|                                 | 35      | 6435          | 93.59                      | 778258    | 591751      | 99.91               | WT                      | WT   | No Cq                  | WT     | No Cq | WT     | Yes                                               |
| SMALL BIOPSIES (n. 11)          | 1       | 6091          | 96.05                      | 693218    | 556776      | 99.87               | WT                      | WT   | No Cq                  | WT     | No Cq | WT     | Yes                                               |
|                                 | 2       | 5617          | 82.89                      | 660946    | 532491      | 99.98               | WT                      | WT   | No Cq                  | WT     | No Cq | WT     | Yes                                               |
|                                 | 4       | 10734         | 78.59                      | 1120470   | 985576      | 99.98               | WT                      | WT   | No Cq                  | WT     | No Cq | WT     | Yes                                               |
|                                 | 7       | 5662          | 89.52                      | 649946    | 520117      | 99.93               | WT                      | WT   | No Cq                  | WT     | No Cq | WT     | Yes                                               |
|                                 | 8       | 12317         | 82.29                      | 1287846   | 1143996     | 99.96               | WT                      | WT   | No Cq                  | WT     | No Cq | WT     | Yes                                               |
|                                 | 9       | 4877          | 87.61                      | 1141620   | 992098      | 99.93               | WT                      | WT   | No Cq                  | WT     | No Cq | WT     | Yes                                               |

|                        |    |       |       |         |         |       |                         |    |       |     |       |    |     |
|------------------------|----|-------|-------|---------|---------|-------|-------------------------|----|-------|-----|-------|----|-----|
| CYTOLOGICAL<br>(n. 26) | 10 | 5086  | 85.26 | 1202308 | 1042434 | 99.88 | WT                      | WT | No Cq | WT  | No Cq | WT | Yes |
|                        | 11 | 6217  | 87.18 | 1474906 | 1259014 | 99.93 | WT                      | WT | No Cq | WT  | No Cq | WT | Yes |
|                        | 13 | 11454 | 61.89 | 3011618 | 2551070 | 99.68 | WT                      | WT | No Cq | WT  | No Cq | WT | Yes |
|                        | 14 | 10383 | 72.72 | 1092934 | 961568  | 99.97 | WT                      | WT | No Cq | WT  | No Cq | WT | Yes |
|                        | 15 | 9912  | 73.69 | 1020548 | 916144  | 99.97 | WT                      | WT | No Cq | WT  | No Cq | WT | Yes |
|                        | 1  | 3603  | 71.12 | 700190  | 449133  | 99.98 | WT                      | WT | No Cq | WT  | No Cq | WT | Yes |
|                        | 2  | 4155  | 73.31 | 769042  | 516138  | 99.99 | WT                      | WT | No Cq | WT  | No Cq | WT | Yes |
|                        | 3  | 3437  | 69.38 | 846782  | 429421  | 99.97 | WT                      | WT | No Cq | WT  | No Cq | WT | Yes |
|                        | 4  | 5065  | 69.55 | 759778  | 628526  | 99.95 | WT                      | WT | No Cq | WT  | No Cq | WT | Yes |
|                        | 6  | 3151  | 69.53 | 419946  | 300127  | 98.81 | WT                      | WT | No Cq | WT  | No Cq | WT | Yes |
|                        | 11 | 4966  | 92.96 | 590226  | 477608  | 99.98 | WT                      | WT | No Cq | WT  | No Cq | WT | Yes |
|                        | 12 | 4139  | 84.40 | 1212546 | 968986  | 99.62 | WT                      | WT | No Cq | WT  | No Cq | WT | Yes |
|                        | 13 | 4940  | 69.32 | 524222  | 483082  | 99.99 | WT                      | WT | No Cq | WT  | No Cq | WT | Yes |
|                        | 14 | 4044  | 65.73 | 462494  | 429339  | 99.99 | WT                      | WT | No Cq | WT  | No Cq | WT | Yes |
|                        | 15 | 3231  | 85.85 | 1508370 | 735938  | 99.99 | WT                      | WT | No Cq | WT  | No Cq | WT | Yes |
|                        | 16 | 3702  | 84.61 | 1214370 | 816424  | 99.85 | c.2573T>G (L858R) ex 21 | WT | 2.0   | MUT | No Cq | WT | Yes |
|                        | 17 | 3764  | 90.99 | 1116112 | 814700  | 99.99 | WT                      | WT | No Cq | WT  | No Cq | WT | Yes |
|                        | 18 | 1095  | 89.29 | 321792  | 242184  | 99.88 | WT                      | WT | No Cq | WT  | No Cq | WT | Yes |
|                        | 19 | 2739  | 90.45 | 763566  | 611836  | 99.90 | WT                      | WT | No Cq | WT  | No Cq | WT | Yes |
|                        | 20 | 3576  | 74.03 | 390326  | 329894  | 99.96 | WT                      | WT | No Cq | WT  | No Cq | WT | Yes |
|                        | 22 | 3280  | 78.0  | 339198  | 299554  | 99.96 | WT                      | WT | No Cq | WT  | No Cq | WT | Yes |
|                        | 23 | 3677  | 78.2  | 403984  | 337955  | 99.98 | WT                      | WT | No Cq | WT  | No Cq | WT | Yes |
|                        | 24 | 3929  | 76.09 | 425710  | 364116  | 99.98 | WT                      | WT | No Cq | WT  | No Cq | WT | Yes |
|                        | 25 | 3355  | 76.96 | 370362  | 309575  | 99.98 | WT                      | WT | No Cq | WT  | No Cq | WT | Yes |
|                        | 26 | 3299  | 76.38 | 361650  | 305629  | 99.96 | WT                      | WT | No Cq | WT  | No Cq | WT | Yes |
|                        | 28 | 3389  | 72.41 | 394458  | 316867  | 99.97 | WT                      | WT | No Cq | WT  | No Cq | WT | Yes |
|                        | 29 | 3321  | 75.71 | 374354  | 306918  | 99.97 | WT                      | WT | No Cq | WT  | No Cq | WT | Yes |
|                        | 31 | 3582  | 74.17 | 406956  | 331254  | 99.95 | WT                      | WT | No Cq | WT  | No Cq | WT | Yes |
|                        | 32 | 3372  | 78.21 | 357222  | 305658  | 99.95 | WT                      | WT | No Cq | WT  | No Cq | WT | Yes |
|                        | 35 | 2790  | 82.22 | 629526  | 540746  | 99.95 | WT                      | WT | No Cq | WT  | No Cq | WT | Yes |
|                        | 36 | 1377  | 77.95 | 568188  | 319692  | 99.83 | WT                      | WT | No Cq | WT  | No Cq | WT | Yes |

MSSs: mixed stained slides; ex: exon; WT: wild type; MUT mutated.
